# Supplementary material
Source: PubMed Central journal article supplement (PMC4706632)

Supplemental Figure 1. Kaplan-Meier of overall survival following lung transplantation

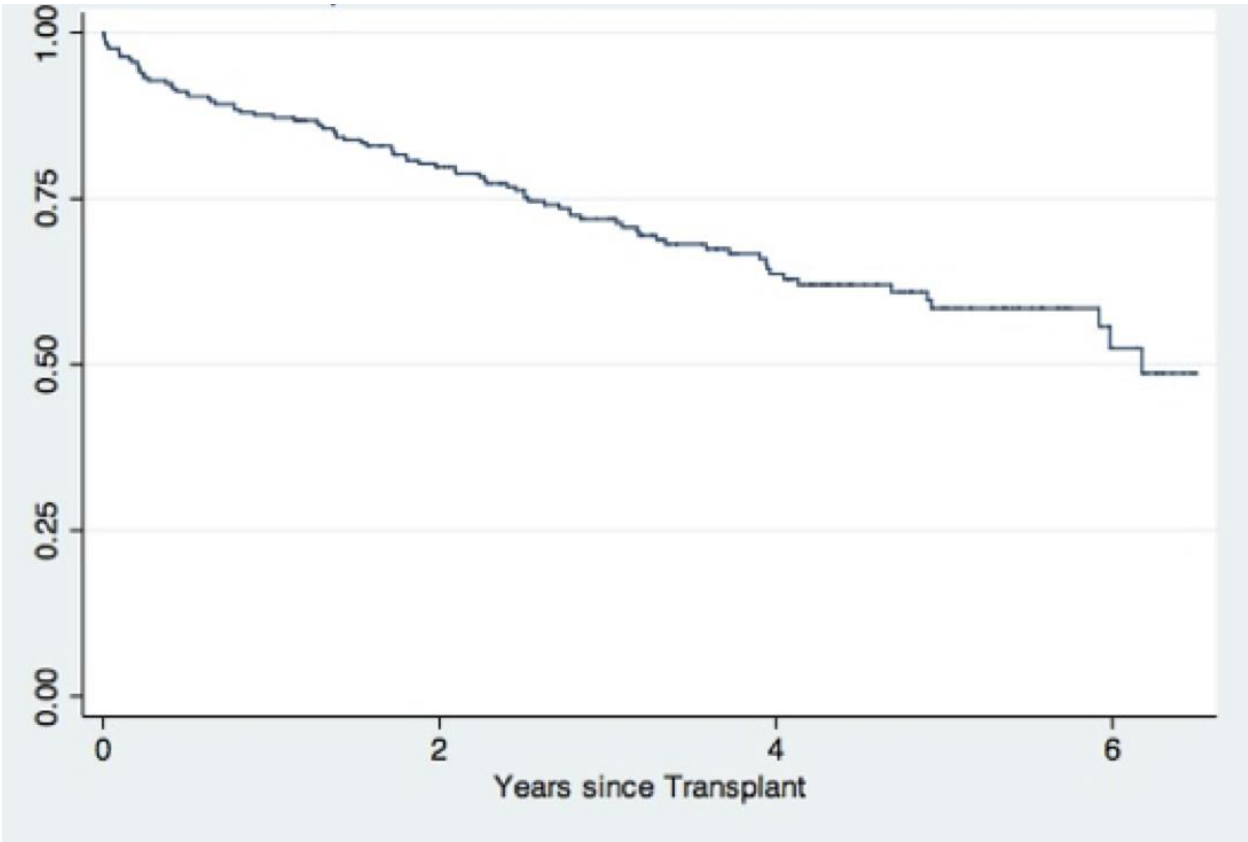

Supplement: supp_civ871_civ871supp.pdf [file supp_civ871_civ871supp.pdf]
